# Supplementary material
Source: Research Square preprint supplement (doi:10.21203/rs.3.rs-9538635/v1)
Supplement: Supplementary file 1 [file 39dc3d1af67ea394c29b5976.xlsx]

## Sheet: גיליון1
model	taxa	validated	total_score	consistency	annotation_met	annotation_rxn	annotation_gene	annotation_sbo
GSMM_1	s__unidentified_Aquabacterium	TRUE	68.813	47.164	79.877	76.527	33.333	90.903
GSMM_10	s__unidentified_Hylemonella	TRUE	68.372	45.967	80.181	76.555	33.333	90.903
GSMM_11	s__Acinetobacter pittii	TRUE	70.371	50.978	80.904	76.509	33.333	90.902
GSMM_12	s__Reyranella sp001897995	TRUE	68.631	46.582	80.258	76.73	33.333	90.904
GSMM_13	s__Xanthomonas euroxanthea	TRUE	68.67	46.786	79.937	76.508	33.333	90.903
GSMM_14	s__unidentified_Hyphomicrobium_A	TRUE	68.951	47.523	79.891	76.484	33.333	90.903
GSMM_15	s__Brevundimonas nasdae	TRUE	85.781	90.622	80.379	76.935	33.333	90.902
GSMM_16	s__unidentified_Burkholderiaceae	TRUE	85.338	89.701	79.822	76.343	33.333	90.903
GSMM_17	s__Sphingomonas ginsenosidimutans	TRUE	68.083	45.238	80.026	76.629	33.333	90.903
GSMM_18	s__unidentified_Sediminibacterium	TRUE	69.28	47.802	81.775	77.584	33.333	90.902
GSMM_19	s__Comamonas terrigena	TRUE	67.878	44.722	80.252	76.349	33.333	90.903
GSMM_2	s__unidentified_Terriglobus	TRUE	85.543	89.967	80.727	76.818	33.333	90.902
GSMM_20	s__Pantoea vagans	TRUE	84.883	87.935	82.109	77.189	33.333	90.903
GSMM_21	s__unidentified_Alphaproteobacteria	TRUE	69.106	47.907	80.283	76.185	33.333	90.9
GSMM_22	s__Mesorhizobium terrae	TRUE	68.461	46.216	80.045	76.571	33.333	90.904
GSMM_23	s__Pantoea endophytica	TRUE	68.218	45.104	81.911	77.262	33.333	90.903
GSMM_24	s__Methylobacterium_Radiotolerans	TRUE	68.352	46	79.914	76.367	33.333	90.903
GSMM_3	s__Pseudomonas_E coleopterorum	TRUE	85.776	90.751	80.204	76.367	33.333	90.903
GSMM_4	s__Neisseria subflava_C	TRUE	86.104	91.292	81.056	77.116	33.333	90.9
GSMM_5	s__unidentified_Sphingomonas	TRUE	68.575	46.561	79.981	76.363	33.333	90.903
GSMM_6	s__Cutibacterium acnes	TRUE	69.926	49.793	80.825	76.8	33.333	90.901
GSMM_7	s__unidentified_Nucleicultricaceae	TRUE	69.575	49.194	80.138	75.91	33.333	90.899
GSMM_8	s__Kosakonia cowanii	TRUE	68.185	45.069	81.816	77.099	33.333	90.902
GSMM_9	s__Pseudomonas_E juntendi	TRUE	68.708	47.025	79.544	76.163	33.333	90.903
PE	s__Penicillium_Expansum	TRUE	86.188	91.47	80.687	77.665	33.333	90.903
			73.5107	59.0948
