# Supplementary material
Source: Research Square preprint supplement (doi:10.21203/rs.3.rs-9538635/v1)
Supplement: Supplementary file 1 [file 40954fb6af51cd9c84318adb.docx]

# Supplementary Information

Additional file 1: Genomic characteristics of MAGs

Additional file 2: GSMM attributes

Additional file 3: GSMM MEMOTE tests results

Additional file 4: GSMM growth in different environments

Additional file 5: Models gap-filling details

Additional file 6: dFBA flux results

Additional file 7: Experimental results

Additional file 8: Supplementary Tables and figures.
