# Supplementary material
Source: Research Square preprint supplement (doi:10.21203/rs.3.rs-9538635/v1)
Supplement: Supplementary file 2 [file 83634578969e4c6090aaf0bc.docx]

**Supplementary Table 1:** *Lab minimal medium: Quantities refer to 600ml substrate*

| ammonium sulphate | 0.6 gm |
| --- | --- |
| dipotassium phosphate | 4.2 gm |
| monopotassium phosphate | 1.2 gm |
| sodium citrate | 0.3 gm |
| magnesium sulphate | 0.06 gm |
| distilled water | 600 ml |
| Agar | 9 gm |
| Sugar %2 (glucose/sucrose/fructose) | 120 gm |

**Supplementary Table 2: Composition of the *In Silico* Apple-like Medium** *Concentrations reflects the specific abundance of apple exudates (45). Trace elements and vitamins were set to non-limiting bounds (1000.0) to prevent artificial limitation.*

|  | Compound | (Concentration) |
| --- | --- | --- |
| Sugars | D-Fructose | 350.0 |
| D-Glucose | 120.0 |
| Sucrose | 80.0 |
| D-Sorbitol | 40.0 |
| L-Sorbitol | 5.0 |
| Organic Acids | L-Malic acid | 45.0 |
| Citric acid | 2.0 |
| Succinic acid | 0.5 |
| Fumaric acid | 0.1 |
| Amino Acids | L-Asparagine | 3.0 |
| L-Serine | 1.0 |
| L-Aspartic acid | 4.0 |
| L-Glutamic acid | 3.0 |
| L-Alanine | 1.5 |
| L-Valine | 0.5 |
| L-Phenylalanine | 0.5 |
| L-Threonine | 0.5 |
| L-Arginine | 1.0 |
| L-Proline | 1.0 |
| Fatty Acids | Palmitic acid (C16:0) | 1.5 |
| Stearic acid (C18:0) | 0.5 |
| Oleic acid (C18:1) | 1.0 |
| Linoleic acid (C18:2) | 1.0 |
| Aromatic Compounds | Chlorogenic acid | 2.0 |
| Protocatechuic acid | 1.0 |
| Quercetin | 0.5 |
| Phloridzin | 1.0 |
| Catechin | 0.5 |
| Epicatechin | 0.5 |
| Trace Elements and Minerals | Zinc (Zn) | 1000.0 |
| Copper (Cu) | 1000.0 |
| Iron (Fe) | 1000.0 |
| Manganese (Mn) | 1000.0 |
| Cobalt (Co) | 1000.0 |
| Magnesium (Mg) | 1000.0 |
| Calcium (Ca) | 1000.0 |
| Potassium (K) | 1000.0 |
| Sodium (Na) | 1000.0 |
| Chloride (Cl) | 1000.0 |
| Ammonium (NH4) | 1000.0 |
| Phosphate (Pi) | 1000.0 |
| Sulfate (SO4) | 1000.0 |
| Vitamins | Biotin (B7) | 1000.0 |
| Pantothenate (B5) | 1000.0 |
| Thiamin (B1) | 1000.0 |
| Riboflavin (B2) | 1000.0 |
| Pyridoxine (B6) | 1000.0 |
| Nicotinamide (B3) | 1000.0 |
| Folate (B9) | 1000.0 |
| Cobalamin (B12) | 1000.0 |
| L-ascorbate (Vitamin C) | 1000.0 |
|  | H20 | 1000.0 |
| Hidrogen | 1000.0 |
| Oxigen | 1000.0 |

**Supplementary Table 3: Reference bacterial isolates used for experimental validation.** *List of the nine specific bacterial strains obtained from the German Collection of Microorganisms and Cell Cultures (DSMZ). These isolates were selected based on their taxonomic identity to the high-quality MAGs recovered from the native apple fruit microbiome, serving as the biological reference for model curation and phenotypic validation.*

| Code | Organism |
| --- | --- |
| DSM 1819 | Methylobacterium radiotolerans |
| DSM 111930 | Kosakonia cowanii |
| DSM 109244 | Pseudomonas juntendi |
| DSM 9318 | Acinetobacter pittii |
| DSM 100487 | Brevundimonas nasdae |
| DSM 7099 | Comamonas terrigena |
| DSM 100785 | Pantoea endophytica |
| DSM 23078 | Pantoea vagans |
| DSM 17000 | Sphingomonas yunnanensis |

**Supplementary Table 4. Quantitative assessment of GSMM quality improvement following manual curation.** *Model quality was evaluated using the MEMOTE test suite. "Orig." refers to the initial automated draft models, while "Gap-Filled" refers to the final manually curated versions. The table compares Stoichiometric Consistency (the percentage of reactions that rigorously conserve mass and charge) and the Total MEMOTE Score (a comprehensive metric of model annotation and feasibility). All values are reported as percentages (%). The "Improvement" columns denote the net percentage-point increase in model quality achieved through targeted reconstruction of biosynthetic pathways and transport mechanisms.*

| Model ID | Orig. Stoich, | Gap-Filled Stoich. | Improvement | Orig. Total | Gap-Filled Total | Improvement |
| --- | --- | --- | --- | --- | --- | --- |
| *S. yunnanensis* | 46.56 | 48.92 | 2.36 | 68.57 | 69.48 | 0.91 | |
| *K. cowanii* | 45.07 | 51.36 | 6.29 | 68.19 | 70.62 | 2.43 | |
| *P. juntendi* | 47.02 | 49.43 | 2.41 | 68.71 | 69.61 | 0.9 | |
| *A. pittii* | 50.98 | 51.15 | 0.17 | 70.37 | 74.01 | 3.64 | |
| *B. nasdae* | 90.62 | 92.15 | 1.53 | 85.78 | 86.33 | 0.55 | |
| *C. terrigena* | 44.72 | 48.34 | 3.62 | 67.88 | 72.75 | 4.87 | |
| *P. vagans* | 87.94 | 93.4 | 5.46 | 84.88 | 90.68 | 5.8 | |
| *P. endophytica* | 45.1 | 50.59 | 5.49 | 68.22 | 70.32 | 2.1 | |
| *M. radiotolerans* | 46 | 49.22 | 3.22 | 68.35 | 70.59 | 2.24 | |

| 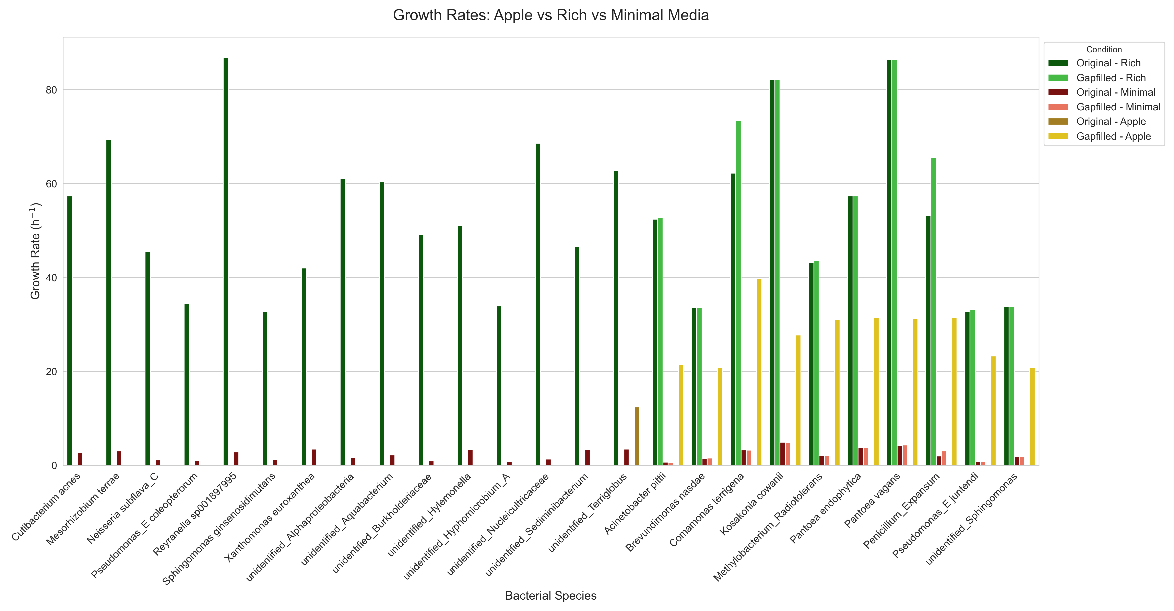 |
| --- |
| **Supplementary Figure 1. *In-silico* growth rate validation and gap-filling impact across diverse nutrient environments.** Predicted growth rates for reconstructed GSMMs across three distinct media conditions: Rich (green), Minimal (red), and Apple-like medium (gold) media. Bars represent the predicted growth flux for both "Original" (darker shades) and "Gap-filled" (lighter shades) versions of each model. Gap-filling was performed to resolve network gaps and enable biomass production, particularly in nutrient-limited environments. Growth rates are expressed as the objective function flux h-1. |

| 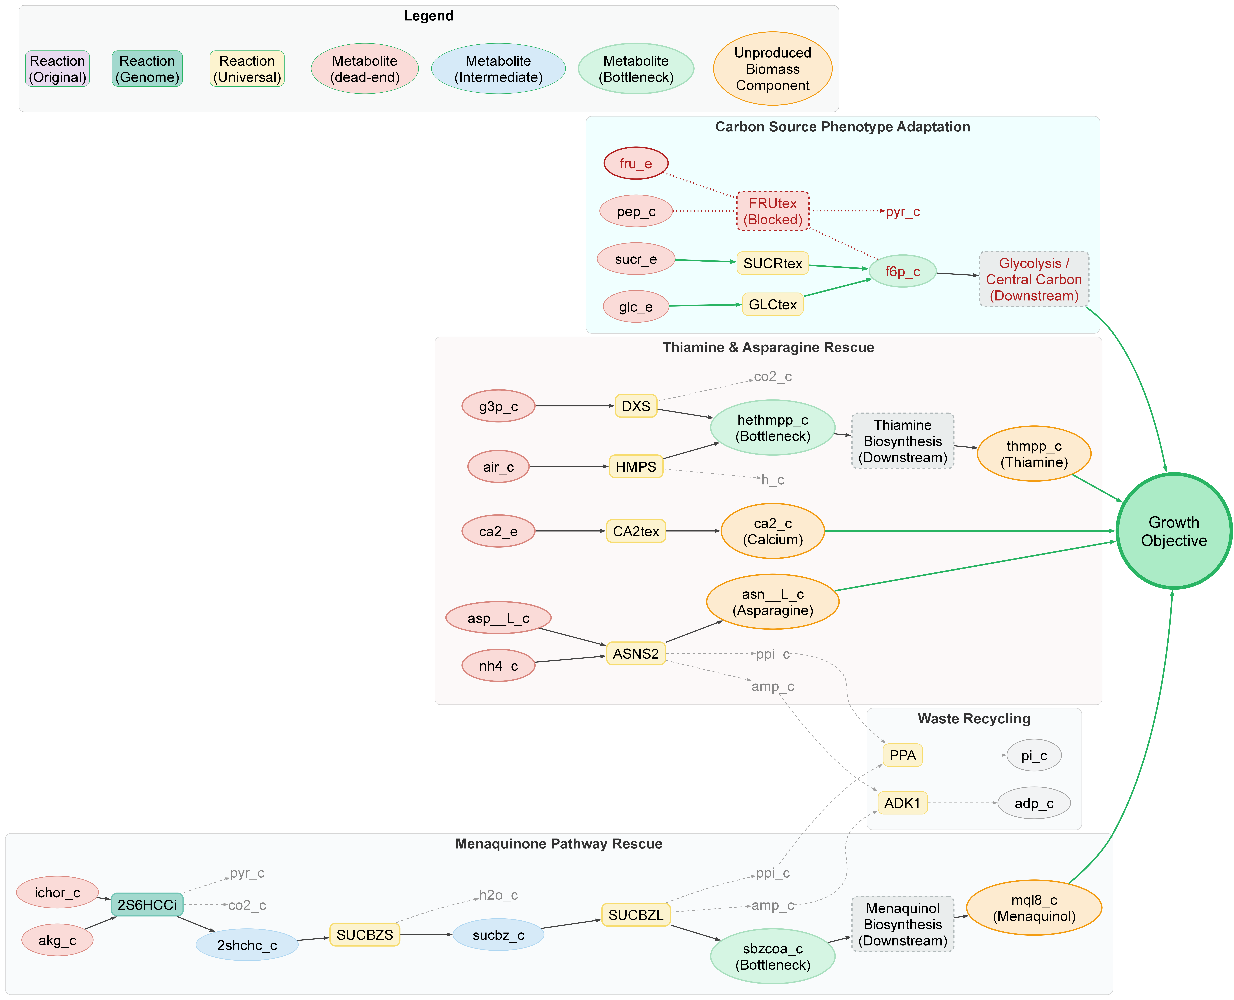 |
| --- |
| **Supplementary Figure 2: Pathway reconstruction and functional refinement of the *A.pittii* metabolic model.** Schematic representation of the manual curation performed to restore critical metabolic capabilities required for biomass formation. Nodes represent metabolites (ellipses) and enzymatic reactions or downstream pathways (rectangles). Reaction nodes are color-coded by origin: purple indicates reactions present in the automated draft, green denotes genome-supported additions, and yellow highlights gap-filled reactions added from a universal database. Dashed grey rectangles represent downstream pathway blocks. Metabolite statuses are distinguished by color: red for dead-ends, light blue for intermediates, green for metabolic bottlenecks, and orange for unproduced biomass components. The network diagram illustrates the specific routes reconstructed to bridge metabolic discontinuities, including the addition of glucose and sucrose transporters to bypass central carbon bottlenecks, the depiction of a blocked fructose transport route in accordance with laboratory results, the integration of 2S6HCCi, SUCBZS, and SUCBZL to enable menaquinol biosynthesis, and the gap-filling of thiamine (HMPS, DXS) and asparagine (ASNS2) production alongside calcium transport. Essential waste recycling is also depicted, with Inorganic Pyrophosphatase (PPA) and Adenylate Kinase (ADK1) added to recycle pyrophosphate and AMP byproducts. The successful completion of these modules links central metabolism and essential precursors to the final biomass growth objective function (green circle). |

| 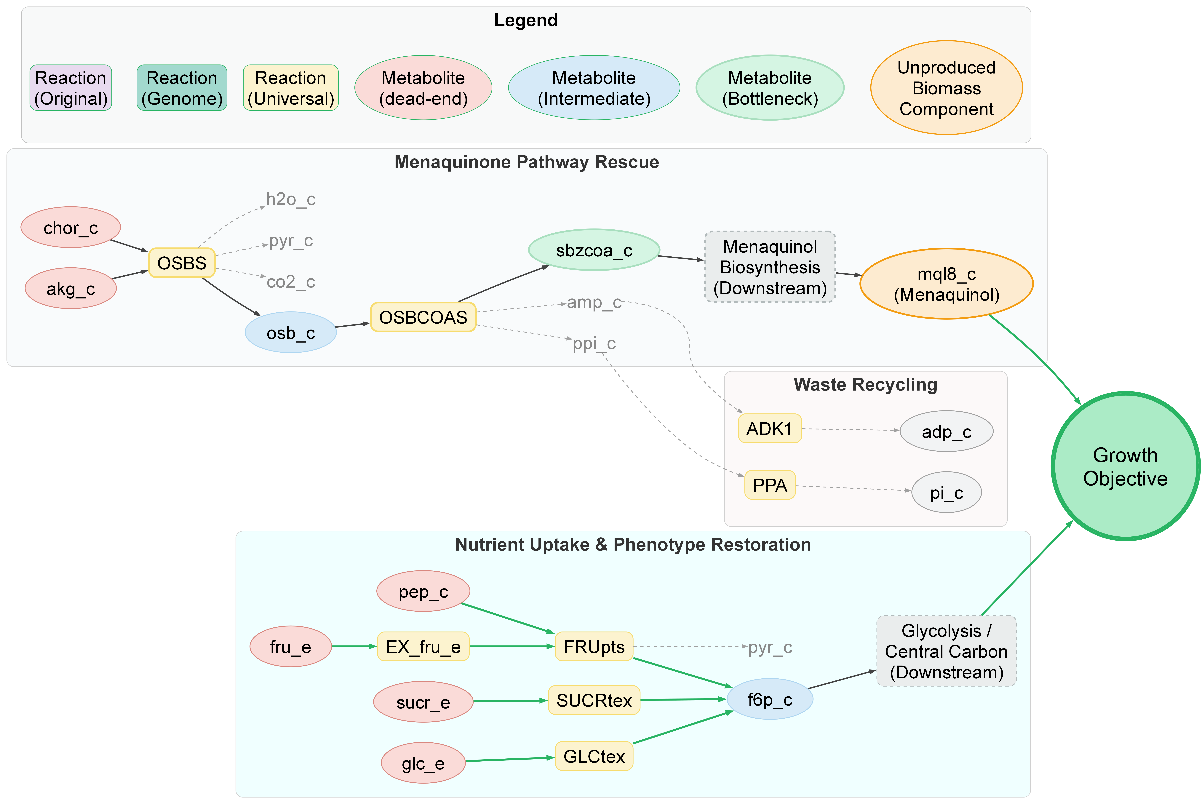 |
| --- |
| **Supplementary Figure 3: Pathway reconstruction and functional refinement of the *B. nasdae* metabolic model.** Schematic representation of the manual curation performed to restore critical metabolic capabilities required for biomass formation. Nodes represent metabolites (ellipses) and enzymatic reactions or downstream pathways (rectangles). Reaction nodes are color-coded by origin: purple indicates reactions present in the automated draft, green denotes genome-supported additions, and yellow highlights gap-filled reactions added from a universal database. Dashed grey rectangles represent downstream pathway blocks. Metabolite statuses are distinguished by color: red for dead-ends, light blue for intermediates, green for metabolic bottlenecks, and orange for unproduced biomass components. The network diagram illustrates the specific routes reconstructed to bridge metabolic discontinuities, including the addition of glucose (GLCtex) and sucrose (SUCRtex) transporters, and the integration of an active fructose phosphotransferase system (EX_fru_e, FRUpts) that utilizes phosphoenolpyruvate (pep) to bypass central carbon bottlenecks. Furthermore, the diagram details the integration of OSBS and OSBCOAS to resolve a bottleneck at succinylbenzoate-CoA (sbzcoa) and enable menaquinol (mql8) biosynthesis from alpha-ketoglutarate (akg) and chorismate (chor). Essential waste recycling is also depicted, with Inorganic Pyrophosphatase (PPA) and Adenylate Kinase (ADK1) added to recycle pyrophosphate and AMP byproducts. The successful completion of these modules links central metabolism and essential precursors to the final biomass growth objective function (green circle). |

| 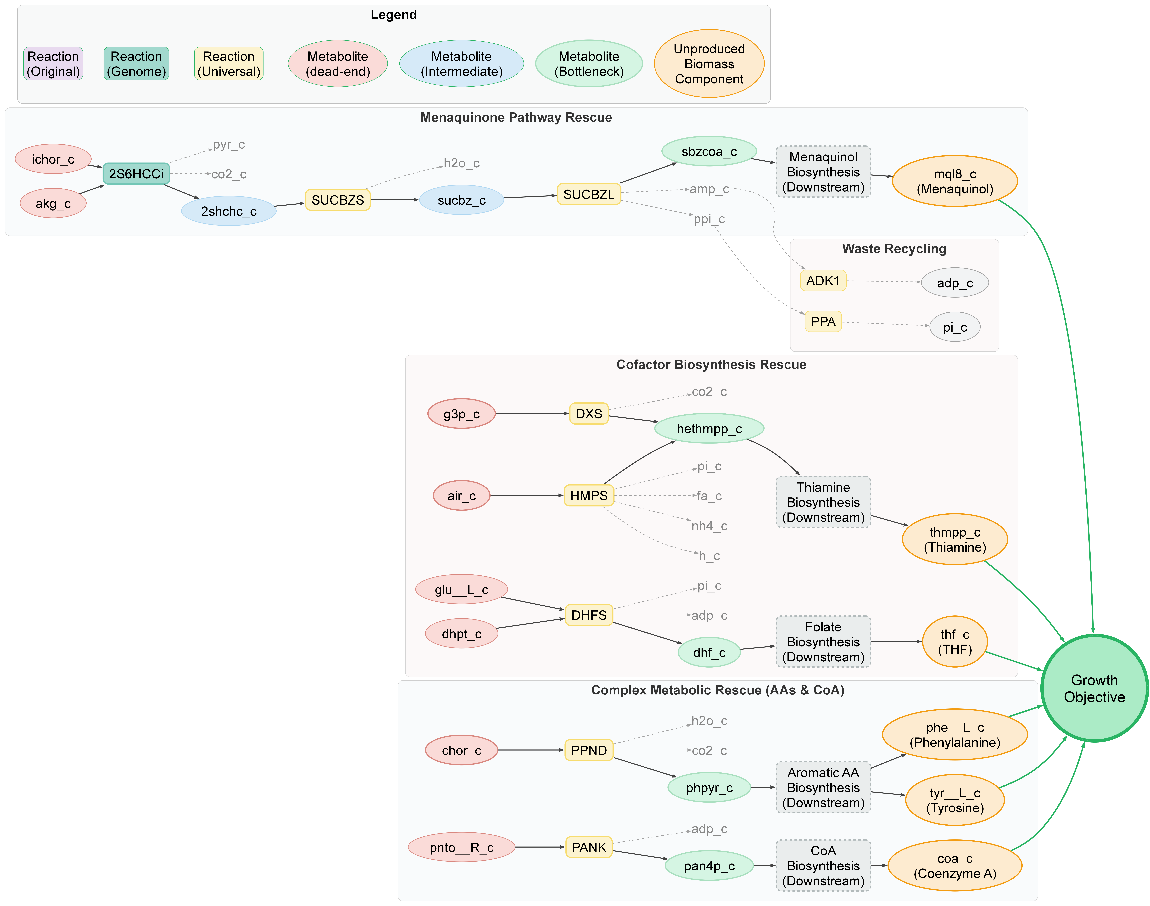 |
| --- |
| **Supplementary Figure 4: Pathway reconstruction and functional refinement of the *C. terrigena* metabolic model.** Schematic representation of the manual curation performed to restore critical metabolic capabilities required for biomass formation. Nodes represent metabolites (ellipses) and enzymatic reactions or downstream pathways (rectangles). Reaction nodes are color-coded by origin: purple indicates reactions present in the automated draft, green denotes genome-supported additions, and yellow highlights gap-filled reactions added from a universal database. Dashed grey rectangles represent downstream pathway blocks. Metabolite statuses are distinguished by color: red for dead-ends, light blue for intermediates, green for metabolic bottlenecks, and orange for unproduced biomass components. The network diagram illustrates the specific routes reconstructed to bridge metabolic discontinuities, including the integration of 2S6HCCi, SUCBZS, and SUCBZL to enable menaquinol biosynthesis, and the gap-filling of tetrahydrofolate (DHFS) and thiamine (HMPS, DXS) production. Furthermore, the diagram details the restoration of Coenzyme A (PANK) and aromatic amino acid (PPND) biosynthesis, thereby yielding tyrosine and phenylalanine. Essential waste recycling is also depicted, with Inorganic Pyrophosphatase (PPA) and Adenylate Kinase (ADK1) added to recycle pyrophosphate and AMP byproducts. The successful completion of these modules links central metabolism and essential precursors to the final biomass growth objective function (green circle). |

| 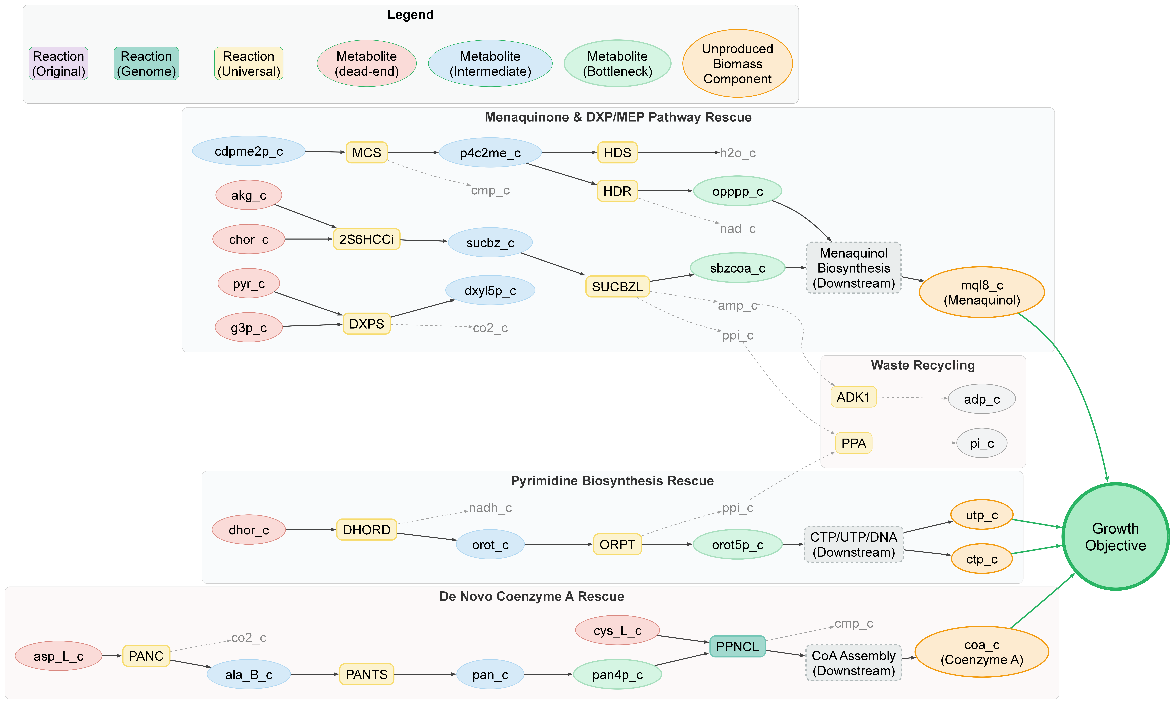 |
| --- |
| **Supplementary Figure 5: Pathway reconstruction and functional refinement of the *M. radiotolerans* metabolic model.** schematic representation of the manual curation performed to restore critical metabolic capabilities required for biomass formation. Nodes represent metabolites (ellipses) and enzymatic reactions or downstream pathways (rectangles). Reaction nodes are color-coded by origin: purple indicates reactions present in the automated draft, green denotes genome-supported additions, and yellow highlights gap-filled reactions added from a universal database. Dashed grey rectangles represent downstream pathway blocks. Metabolite statuses are distinguished by color: red for dead-ends, light blue for intermediates, green for metabolic bottlenecks, and orange for final targets and unproduced biomass components. The network diagram illustrates the specific routes reconstructed to bridge metabolic discontinuities, including the rescue of the DXP/MEP pathway and menaquinone biosynthesis to resolve central bottlenecks at diphosphate (opppp) and succinylbenzoate-CoA (sbzcoa). Furthermore, the diagram details the gap-filling required for complete *de novo* Coenzyme A (CoA) synthesis alongside the rescue of pyrimidine biosynthesis, bridging a critical discontinuity at orotidine 5'-phosphate (orot5p). Essential waste recycling is also depicted, with Inorganic Pyrophosphatase (PPA) and Adenylate Kinase (ADK1) added to recycle pyrophosphate and AMP byproducts. The successful completion of these modules links central metabolism and essential precursors to the final biomass growth objective function (green circle). |

| 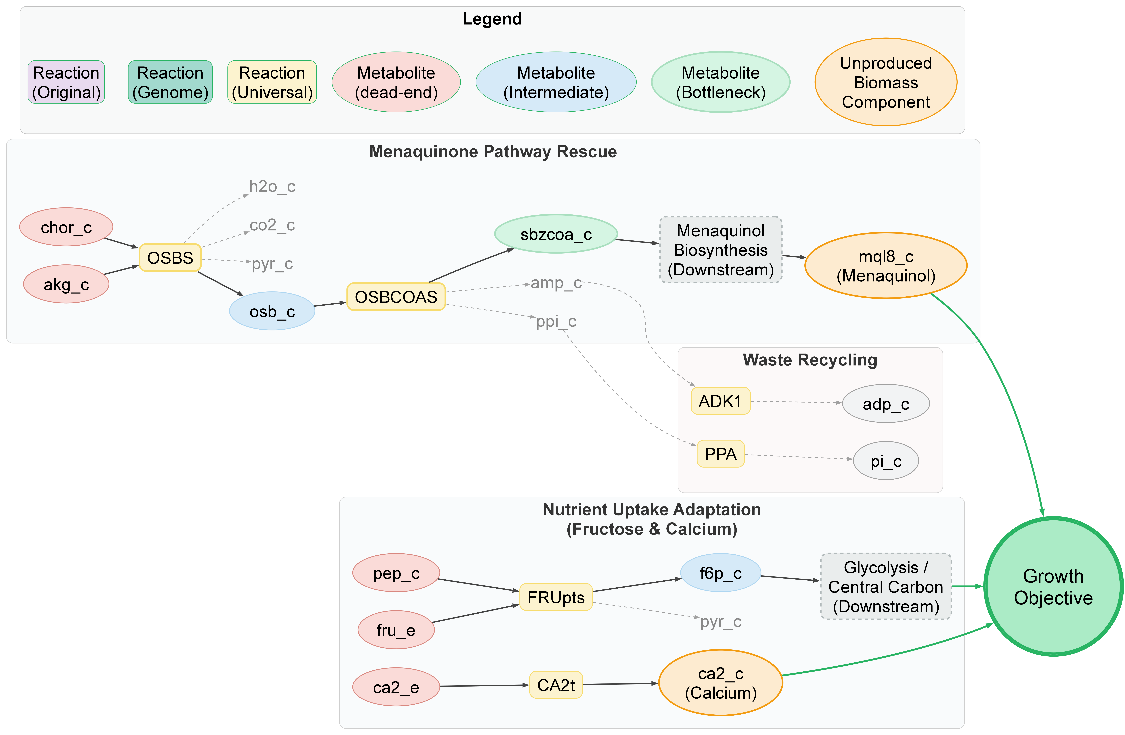 |
| --- |
| **Supplementary Figure 6: Pathway reconstruction and functional refinement of the *S. yunnanensis* metabolic model.** Schematic representation of the manual curation performed to restore critical metabolic capabilities required for biomass formation. Nodes represent metabolites (ellipses) and enzymatic reactions or downstream pathways (rectangles). Reaction nodes are color-coded by origin: purple indicates reactions present in the automated draft, green denotes genome-supported additions, and yellow highlights gap-filled reactions added from a universal database. Dashed grey rectangles represent downstream pathway blocks. Metabolite statuses are distinguished by color: red for dead-ends, light blue for intermediates, green for metabolic bottlenecks, and orange for unproduced biomass components. The network diagram illustrates the specific routes reconstructed to bridge metabolic discontinuities, including the addition of an active fructose phosphotransferase system (FRUpts) to resolve central carbon bottlenecks. Furthermore, the diagram details the integration of OSBS and OSBCOAS to resolve a bottleneck at succinylbenzoate-CoA (sbzcoa) and enable menaquinol biosynthesis. Essential waste recycling is also depicted, with Inorganic Pyrophosphatase (PPA) and Adenylate Kinase (ADK1) added to recycle pyrophosphate and AMP byproducts generated during precursor rescue. The successful completion of these modules links central metabolism and essential precursors to the final biomass growth objective function (green circle). |

| 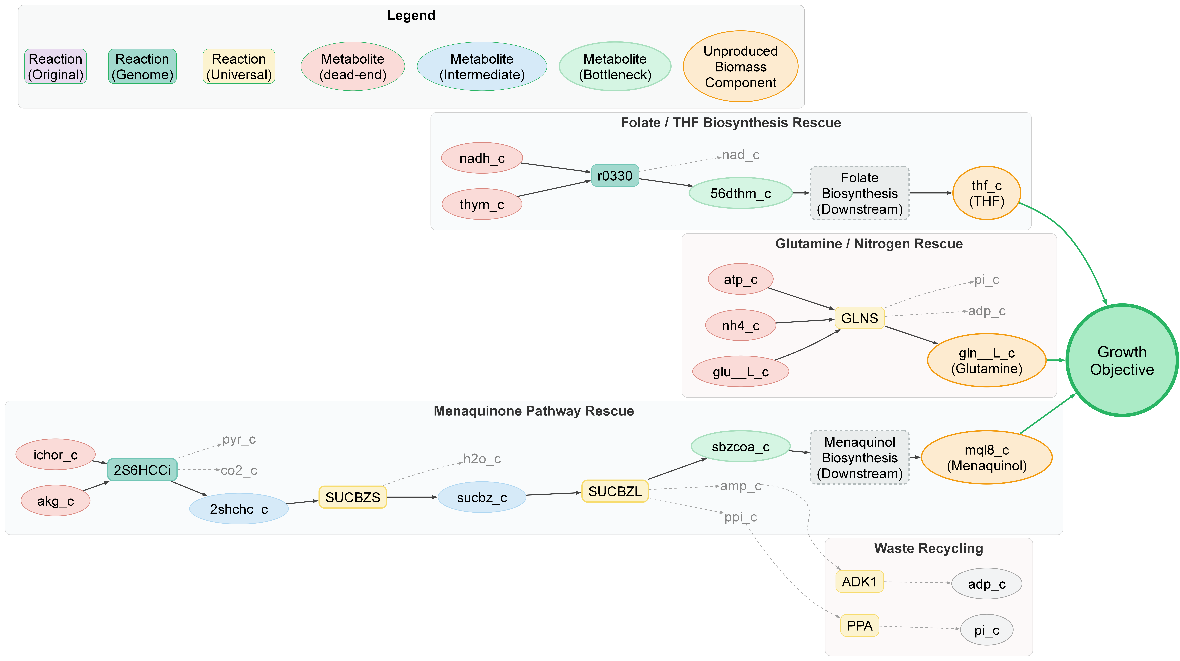 |
| --- |
| **Supplementary Figure 7: Pathway reconstruction and functional refinement of the *P. juntendi* metabolic model.** Schematic representation of the manual curation performed to restore critical metabolic capabilities required for biomass formation. Nodes represent metabolites (ellipses) and enzymatic reactions or downstream pathways (rectangles). Reaction nodes are color-coded by origin: purple indicates reactions present in the automated draft, green denotes genome-supported additions, and yellow highlights gap-filled reactions added from a universal database. Dashed grey rectangles represent downstream pathway blocks. Metabolite statuses are distinguished by color: red for dead-ends, light blue for intermediates, green for metabolic bottlenecks, and orange for unproduced biomass components. The network diagram illustrates the specific routes reconstructed to bridge metabolic discontinuities, focusing on resolving primary bottlenecks at 56dthm (folate biosynthesis), sbzcoa (menaquinone pathway), and gln__L (glutamine synthesis). This encompasses the genome-supported addition of r0330 and 2S6HCCi, as well as the universal gap-filling of GLNS, SUCBZS, and SUCBZL. Essential waste recycling is also depicted, with Inorganic Pyrophosphatase (PPA) and Adenylate Kinase (ADK1) handling pyrophosphate and AMP byproducts. The successful completion of these modules links central metabolism and essential precursors to the final biomass growth objective function (green circle). |

| 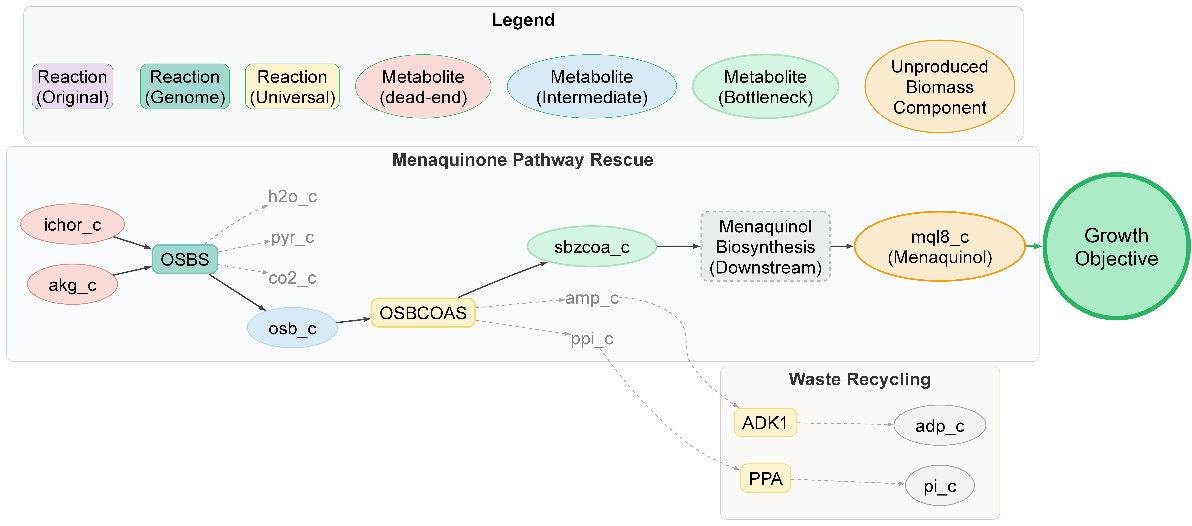 |
| --- |
| **Supplementary Figure 8: Pathway reconstruction and functional refinement of the *P. vagans* metabolic model.** Schematic representation of the manual curation performed to restore critical metabolic capabilities required for biomass formation. Nodes represent metabolites (ellipses) and enzymatic reactions or downstream pathways (rectangles). Reaction nodes are color-coded by origin: purple indicates reactions present in the automated draft, green denotes genome-supported additions, and yellow highlights gap-filled reactions added from a universal database. Dashed grey rectangles represent downstream pathway blocks. Metabolite statuses are distinguished by color: red for dead-ends, light blue for intermediates, green for metabolic bottlenecks, and orange for unproduced biomass components. The network diagram illustrates the specific routes reconstructed to bridge metabolic discontinuities, with a primary focus on resolving the succinylbenzoate-CoA (sbzcoa) bottleneck to rescue menaquinol (mql8) biosynthesis. This was achieved through the targeted integration of genome-supported OSBS and universal OSBCOAS reactions, connecting alpha-ketoglutarate (akg) and isochorismate (ichor) precursors to the downstream pathway. Essential waste recycling is also depicted, utilizing Inorganic Pyrophosphatase (PPA) and Adenylate Kinase (ADK1). The successful completion of these modules links central metabolism and essential precursors to the final biomass growth objective function (green circle). |

| 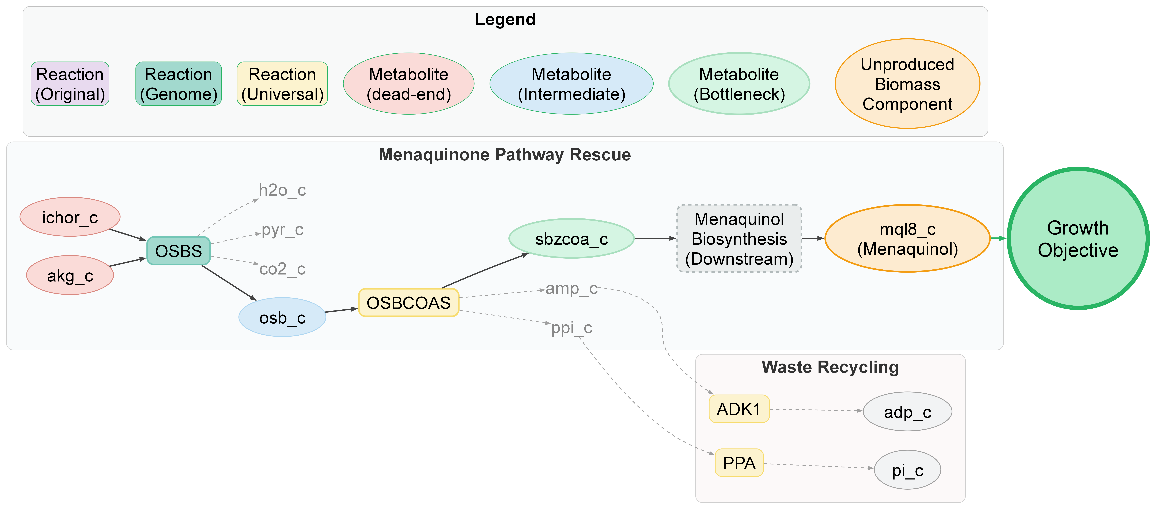 |
| --- |
| **Supplementary Figure 9: Pathway reconstruction and functional refinement of the *P. endophytica* metabolic model.** Schematic representation of the manual curation performed to restore critical metabolic capabilities required for biomass formation. Nodes represent metabolites (ellipses) and enzymatic reactions or downstream pathways (rectangles). Reaction nodes are color-coded by origin: purple indicates reactions present in the automated draft, green denotes genome-supported additions, and yellow highlights gap-filled reactions added from a universal database. Dashed grey rectangles represent downstream pathway blocks. Metabolite statuses are distinguished by color: red for dead-ends, light blue for intermediates, green for metabolic bottlenecks, and orange for unproduced biomass components. The network diagram illustrates the specific routes reconstructed to bridge metabolic discontinuities, targeting the succinylbenzoate-CoA (sbzcoa) bottleneck to restore the menaquinol (mql8) biosynthesis pathway. The gap-filling strategy involved integrating universally derived OSBS and OSBCOAS reactions to bridge the gap between the alpha-ketoglutarate (akg) and chorismate (chor) precursors and the required biomass component. Essential waste recycling is also depicted, with Inorganic Pyrophosphatase (PPA) and Adenylate Kinase (ADK1) added to recycle pyrophosphate and AMP byproducts. The successful completion of these modules links central metabolism to the final biomass growth objective function (green circle). |

| 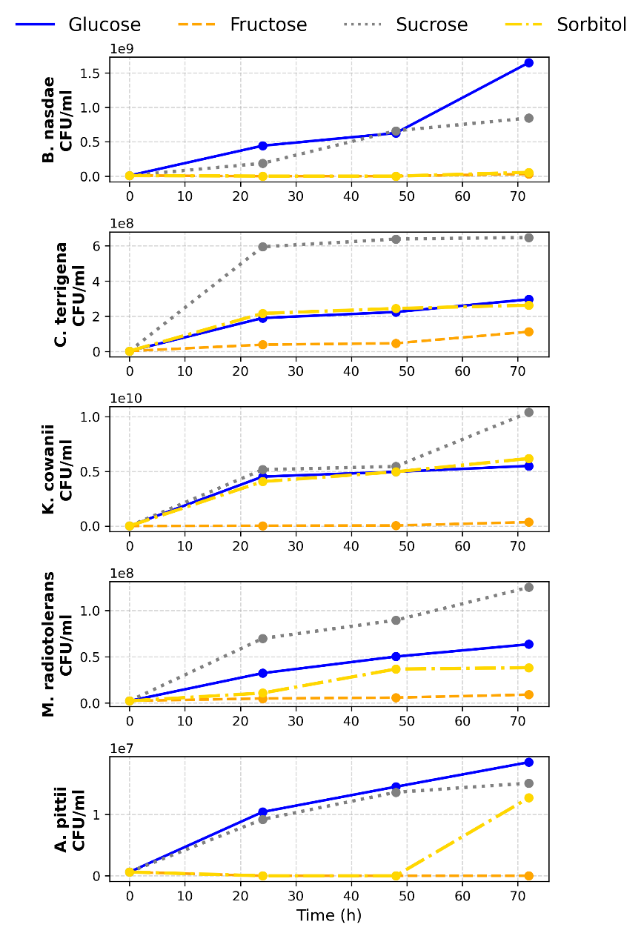 |
| --- |
| **Supplementary Figure 10: Experimental validation of bacterial isolates on key apple-associated carbon sources.** Growth phenotypes of five representative apple epiphytes- *B. nasdae*, *C. terrigena*, *M. radiotolerans*, *K. cowanii*, and *A. pittii-* were evaluated on minimal media supplemented with single carbon sources abundant in the apple carposphere (Glucose, Fructose, Sucrose, and Sorbitol). Data points represent experimental bacterial growth (measured in CFU/mL) at 0, 24, 48, and 72 hours. Colors correspond to the specific carbon source utilized. *B. nasdae*, growth was maximal in minimal media supplemented with 2% glucose (1.65 times 109 cells/mL), followed by sucrose (8.44 times 108 cells/mL), with significantly lower growth observed on sorbitol and fructose. *C. terrigena* exhibited a distinct preference for sucrose (6.48 times 108 cells/mL), followed by comparable growth on glucose and sorbitol, and reduced growth on fructose. *M. radiotolerans* also displayed maximal growth on sucrose (1.25 times 108 cells/mL), followed by glucose and sorbitol, with fructose supporting the least growth (8.95 times 106 cells/mL). *K. cowanii* showed robust growth on sucrose (1.04 times 1010 cells/mL), sorbitol, and glucose, while growth on fructose was notably reduced (3.56 times 108 cells/mL). In contrast, *A. pittii* grew efficiently on glucose and sucrose but was completely unable to utilize fructose as a sole carbon source. |

| A  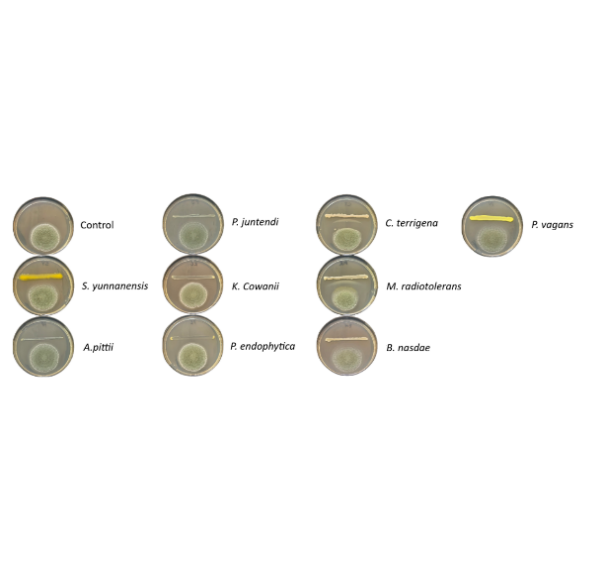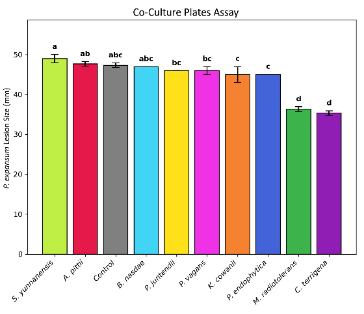 |
| --- |
| B  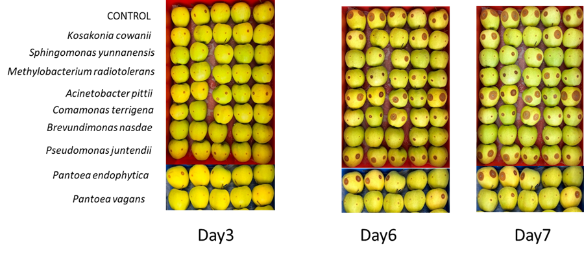 |
| C  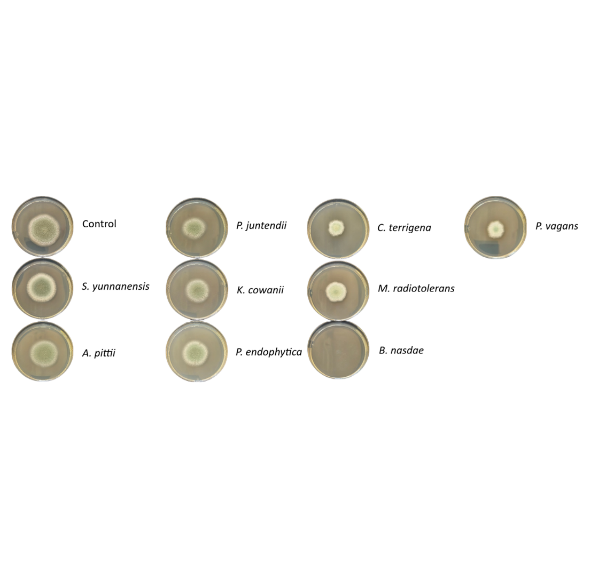 |
| **Supplementary Figure 11. Experimental validation of *Penicillium expansum* inhibition by native bacterial isolates across co-culture plates, double-plate volatiles, and fruit assays.** Representative images and corresponding quantitative bar plots measuring the growth of *P. expansum* after seven days of co-incubation with individual bacterial isolates. **(A)** Co-culture plates assay evaluating *P. expansum* inhibition via resource competition and secreted soluble metabolites. The bar plot shows the mean *P. expansum* radial growth (mm). Different letters above the bars indicate statistically significant differences between treatments, as determined by ANOVA followed by Tukey’s HSD post hoc test (p < 0.05). **(B)** Fruit assay assessing biocontrol efficacy on the native host tissue. **(C)** Double-plate volatile organic compounds (VOCs) assay evaluating inhibition strictly through gaseous emissions without direct physical contact between the microorganisms. |

| 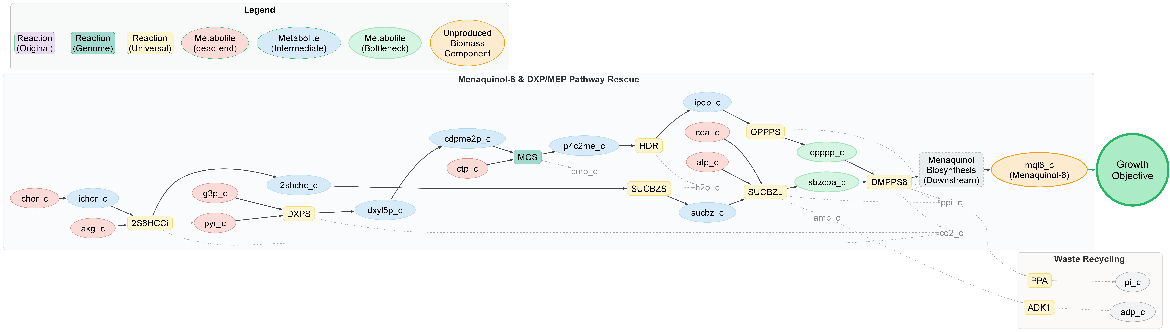 |
| --- |
| **Supplementary Figure 12: Pathway reconstruction and functional refinement of the *P. expansum* metabolic model.** Schematic representation of the manual curation performed to restore critical metabolic capabilities required for biomass formation. Nodes represent metabolites (ellipses) and enzymatic reactions or downstream pathways (rectangles). Reaction nodes are color-coded by origin: purple indicates reactions present in the automated draft, green denotes genome-supported additions, and yellow highlights gap-filled reactions added from a universal database. Dashed grey rectangles represent downstream pathway blocks. Metabolite statuses are distinguished by color: red for dead-ends, light blue for intermediates, green for metabolic bottlenecks, and orange for unproduced biomass components. The network diagram illustrates the specific routes reconstructed to bridge metabolic discontinuities, resolving critical bottlenecks at diphosphate (opppp), succinylbenzoate (sucbz), and succinylbenzoate-CoA (sbzcoa) to rescue menaquinol-8 (mql8) biosynthesis. This comprehensive rescue details both the DXP/MEP pathway steps (incorporating genome-supported MCS alongside universal DXPS, HDR, and OPPPS) to form the isoprenoid side-chain, and the parallel menaquinol backbone steps (incorporating universal 2S6HCCi, SUCBZS, SUCBZL, and DMPPS8). Essential waste recycling is also depicted, with Inorganic Pyrophosphatase (PPA) and Adenylate Kinase (ADK1) managing the resulting byproducts. The successful completion of these modules links central metabolism and essential precursors to the final biomass growth objective function (green circle). |
