# Supplementary material
Source: Research Square preprint supplement (doi:10.21203/rs.3.rs-9538635/v1)
Supplement: Supplementary file 3 [file 52ece665dbf0b4942e4ea5cc.xlsx]

## Sheet: diffusable_ex_results
Replicates	Isolates	GSMM	Day3	Day4	Day6	Day7
1	SY	GSMM_5_gapfilled_final, GSMM_5	20	27	37	42
2	SY	GSMM_5_gapfilled_final, GSMM_5	20	27	42	48
3	SY	GSMM_5_gapfilled_final, GSMM_5	20	27	42	47
1	AP	GSMM_11_gapfilled_final, GSMM_11	10	18	37	46
2	AP	GSMM_11_gapfilled_final, GSMM_11	10	18	36	45
3	AP	GSMM_11_gapfilled_final, GSMM_11	10	19	37	46
1	CT	GSMM_19_gapfillied, GSMM_19	12	20	36	42
2	CT	GSMM_19_gapfillied, GSMM_19	12	17	28	28
3	CT	GSMM_19_gapfillied, GSMM_19	12	17	26	28
1	BN	GSMM_15_gapfilled_final, GSMM_15	6	9	17	18
2	BN	GSMM_15_gapfilled_final, GSMM_15	0	0	13	14
3	BN	GSMM_15_gapfilled_final, GSMM_15	0	0	16	18
1	MR	MR_gapfillied, GSMM_MR	16	20	28	32
2	MR	MR_gapfillied, GSMM_MR	16	20	28	31
3	MR	MR_gapfillied, GSMM_MR	16	20	28	33
1	KC	GSMM_8_gapfillied, GSMM_8	5	11	30	38
2	KC	GSMM_8_gapfillied, GSMM_8	6	14	31	41
3	KC	GSMM_8_gapfillied, GSMM_8	5	11	30	38
1	PE	GSMM_23_gapfillied, GSMM_23	6	16	28	36
2	PE	GSMM_23_gapfillied, GSMM_23	6	15	33	41
3	PE	GSMM_23_gapfillied, GSMM_23	6	10	32	41
1	PJ	GSMM_9_gapfillied, GSMM_9	9	12	36	44
2	PJ	GSMM_9_gapfillied, GSMM_9	5	10	28	35
3	PJ	GSMM_9_gapfillied, GSMM_9	0	2	20	28
1	PV	GSMM_20_gapfillied, GSMM_20	7	14	23	26
2	PV	GSMM_20_gapfillied, GSMM_20	8	15	23	28
3	PV	GSMM_20_gapfillied, GSMM_20	8	15	24	29
1	CONTROL		20	27	41	48
2	CONTROL		20	27	42	50
3	CONTROL		20	27	42	50

## Sheet: fruits_ex_results
Replicates (wounds)	Isolates	GSMM	Day3	Day4	Day6	Day7
1	SY	GSMM_5_gapfilled_final, GSMM_5	0	0	0	0
2	SY	GSMM_5_gapfilled_final, GSMM_5	0	0	0	0
3	SY	GSMM_5_gapfilled_final, GSMM_5	0	0	0	5
4	SY	GSMM_5_gapfilled_final, GSMM_5	4	7	9	13
5	SY	GSMM_5_gapfilled_final, GSMM_5	0	0	0	0
6	SY	GSMM_5_gapfilled_final, GSMM_5	7	11	18	23
7	SY	GSMM_5_gapfilled_final, GSMM_5	0	0	0	0
8	SY	GSMM_5_gapfilled_final, GSMM_5	0	0	0	0
9	SY	GSMM_5_gapfilled_final, GSMM_5	0	0	0	0
10	SY	GSMM_5_gapfilled_final, GSMM_5	0	0	0	0
1	AP	GSMM_11_gapfilled_final, GSMM_11	4	7	14	21
2	AP	GSMM_11_gapfilled_final, GSMM_11	10	15	25	34
3	AP	GSMM_11_gapfilled_final, GSMM_11	4	7	12	18
4	AP	GSMM_11_gapfilled_final, GSMM_11	6	12	20	22
5	AP	GSMM_11_gapfilled_final, GSMM_11	10	13	22	30
6	AP	GSMM_11_gapfilled_final, GSMM_11	9	13	19	24
7	AP	GSMM_11_gapfilled_final, GSMM_11	0	9	14	15
8	AP	GSMM_11_gapfilled_final, GSMM_11	0	8	8	13
9	AP	GSMM_11_gapfilled_final, GSMM_11	10	14	25	32
10	AP	GSMM_11_gapfilled_final, GSMM_11	10	17	28	35
1	CT	GSMM_19_gapfillied, GSMM_19	0	0	0	0
2	CT	GSMM_19_gapfillied, GSMM_19	0	0	0	0
3	CT	GSMM_19_gapfillied, GSMM_19	0	0	9	11
4	CT	GSMM_19_gapfillied, GSMM_19	0	8	11	14
5	CT	GSMM_19_gapfillied, GSMM_19	6	11	24	30
6	CT	GSMM_19_gapfillied, GSMM_19	0	5	16	25
7	CT	GSMM_19_gapfillied, GSMM_19	0	0	5	9
8	CT	GSMM_19_gapfillied, GSMM_19	0	0	6	13
9	CT	GSMM_19_gapfillied, GSMM_19	0	0	9	12
10	CT	GSMM_19_gapfillied, GSMM_19	0	0	10	19
1	BN	GSMM_15_gapfilled_final, GSMM_15	0	0	0	0
2	BN	GSMM_15_gapfilled_final, GSMM_15	0	0	0	0
3	BN	GSMM_15_gapfilled_final, GSMM_15	0	0	0	0
4	BN	GSMM_15_gapfilled_final, GSMM_15	0	0	0	0
5	BN	GSMM_15_gapfilled_final, GSMM_15	0	0	0	0
6	BN	GSMM_15_gapfilled_final, GSMM_15	0	0	0	0
7	BN	GSMM_15_gapfilled_final, GSMM_15	0	0	10	13
8	BN	GSMM_15_gapfilled_final, GSMM_15	0	0	0	0
9	BN	GSMM_15_gapfilled_final, GSMM_15	0	0	0	0
10	BN	GSMM_15_gapfilled_final, GSMM_15	0	0	0	0
1	MR	MR_gapfillied, GSMM_MR	0	0	9	9
2	MR	MR_gapfillied, GSMM_MR	0	0	0	0
3	MR	MR_gapfillied, GSMM_MR	0	0	9	9
4	MR	MR_gapfillied, GSMM_MR	0	0	10	11
5	MR	MR_gapfillied, GSMM_MR	0	0	7	10
6	MR	MR_gapfillied, GSMM_MR	0	0	0	0
7	MR	MR_gapfillied, GSMM_MR	0	0	15	22
8	MR	MR_gapfillied, GSMM_MR	0	0	10	15
9	MR	MR_gapfillied, GSMM_MR	0	0	8	8
10	MR	MR_gapfillied, GSMM_MR	0	0	6	7
1	KC	GSMM_8_gapfillied, GSMM_8	0	8	14	21
2	KC	GSMM_8_gapfillied, GSMM_8	6	11	18	26
3	KC	GSMM_8_gapfillied, GSMM_8	0	0	0	0
4	KC	GSMM_8_gapfillied, GSMM_8	0	0	0	0
5	KC	GSMM_8_gapfillied, GSMM_8	0	0	0	0
6	KC	GSMM_8_gapfillied, GSMM_8	0	0	0	0
7	KC	GSMM_8_gapfillied, GSMM_8	0	4	10	15
8	KC	GSMM_8_gapfillied, GSMM_8	8	13	22	28
9	KC	GSMM_8_gapfillied, GSMM_8	0	0	0	0
10	KC	GSMM_8_gapfillied, GSMM_8	0	0	0	0
1	PE	GSMM_23_gapfillied, GSMM_23	10	12	21	27
2	PE	GSMM_23_gapfillied, GSMM_23	11	11	19	23
3	PE	GSMM_23_gapfillied, GSMM_23	5	10	20	26
4	PE	GSMM_23_gapfillied, GSMM_23	0	5	14	16
5	PE	GSMM_23_gapfillied, GSMM_23	9	10	20	23
6	PE	GSMM_23_gapfillied, GSMM_23	0	0	0	0
7	PE	GSMM_23_gapfillied, GSMM_23	0	0	0	0
8	PE	GSMM_23_gapfillied, GSMM_23	0	0	0	0
9	PE	GSMM_23_gapfillied, GSMM_23	0	0	0	0
10	PE	GSMM_23_gapfillied, GSMM_23	0	0	0	0
1	PJ	GSMM_9_gapfillied, GSMM_9	7	10	17	24
2	PJ	GSMM_9_gapfillied, GSMM_9	7	10	16	25
3	PJ	GSMM_9_gapfillied, GSMM_9	7	9	19	26
4	PJ	GSMM_9_gapfillied, GSMM_9	7	8	12	20
5	PJ	GSMM_9_gapfillied, GSMM_9	8	8	14	15
6	PJ	GSMM_9_gapfillied, GSMM_9	0	7	13	16
7	PJ	GSMM_9_gapfillied, GSMM_9	4	10	15	22
8	PJ	GSMM_9_gapfillied, GSMM_9	0	8	15	19
9	PJ	GSMM_9_gapfillied, GSMM_9	0	8	12	14
10	PJ	GSMM_9_gapfillied, GSMM_9	0	0	10	12
1	PV	GSMM_20_gapfillied, GSMM_20	0	0	0	0
2	PV	GSMM_20_gapfillied, GSMM_20	0	0	0	5
3	PV	GSMM_20_gapfillied, GSMM_20	0	0	0	6
4	PV	GSMM_20_gapfillied, GSMM_20	0	0	7	11
5	PV	GSMM_20_gapfillied, GSMM_20	0	0	0	0
6	PV	GSMM_20_gapfillied, GSMM_20	0	0	0	0
7	PV	GSMM_20_gapfillied, GSMM_20	0	0	0	0
8	PV	GSMM_20_gapfillied, GSMM_20	0	0	0	0
9	PV	GSMM_20_gapfillied, GSMM_20	0	0	0	0
10	PV	GSMM_20_gapfillied, GSMM_20	0	8	14	20
1	CONTROL		9	13	25	34
2	CONTROL		9	13	25	32
3	CONTROL		10	15	29	34
4	CONTROL		11	15	26	33
5	CONTROL		8	10	20	25
6	CONTROL		4	10	18	24
7	CONTROL		0	7	12	19
8	CONTROL		0	0	6	8
9	CONTROL		0	8	13	20
10	CONTROL		8	11	22	26

## Sheet: VOCs_ex_results
Replicates	Isolates	GSMM	Day3	Day4	Day6	Day7
1	SY	GSMM_5_gapfilled_final, GSMM_5	20	27	37	42
2	SY	GSMM_5_gapfilled_final, GSMM_5	20	27	42	48
3	SY	GSMM_5_gapfilled_final, GSMM_5	20	27	42	47
1	AP	GSMM_11_gapfilled_final, GSMM_11	10	18	37	46
2	AP	GSMM_11_gapfilled_final, GSMM_11	10	18	36	45
3	AP	GSMM_11_gapfilled_final, GSMM_11	10	19	37	46
1	CT	GSMM_19_gapfillied, GSMM_19	12	20	36	42
2	CT	GSMM_19_gapfillied, GSMM_19	12	17	28	28
3	CT	GSMM_19_gapfillied, GSMM_19	12	17	26	28
1	BN	GSMM_15_gapfilled_final, GSMM_15	6	9	17	18
2	BN	GSMM_15_gapfilled_final, GSMM_15	0	0	13	14
3	BN	GSMM_15_gapfilled_final, GSMM_15	0	0	16	18
1	MR	MR_gapfillied, GSMM_MR	16	20	28	32
2	MR	MR_gapfillied, GSMM_MR	16	20	28	31
3	MR	MR_gapfillied, GSMM_MR	16	20	28	33
1	KC	GSMM_8_gapfillied, GSMM_8	5	11	30	38
2	KC	GSMM_8_gapfillied, GSMM_8	6	14	31	41
3	KC	GSMM_8_gapfillied, GSMM_8	5	11	30	38
1	PE	GSMM_23_gapfillied, GSMM_23	6	16	28	36
2	PE	GSMM_23_gapfillied, GSMM_23	6	15	33	41
3	PE	GSMM_23_gapfillied, GSMM_23	6	10	32	41
1	PJ	GSMM_9_gapfillied, GSMM_9	9	12	36	44
2	PJ	GSMM_9_gapfillied, GSMM_9	5	10	28	35
3	PJ	GSMM_9_gapfillied, GSMM_9	0	2	20	28
1	PV	GSMM_20_gapfillied, GSMM_20	7	14	23	26
2	PV	GSMM_20_gapfillied, GSMM_20	8	15	23	28
3	PV	GSMM_20_gapfillied, GSMM_20	8	15	24	29
1	CONTROL		20	27	41	48
2	CONTROL		20	27	42	50
3	CONTROL		20	27	42	50
