# Supplementary material
Source: Research Square preprint supplement (doi:10.21203/rs.3.rs-9538635/v1)
Supplement: Supplementary file 5 [file b5e68fc7afaa55d9dc7ba316.xlsx]

## Sheet: Genomic characteristics of MAGs
Genome / MAG ID	GTDB Taxonomic Assignment	completeness	contamination	GC	lineage	N50	size	binner	Accession Number / RefSeq / Notes
bin.1	d__Bacteria;p__Proteobacteria;c__Gammaproteobacteria;o__Burkholderiales;f__Burkholderiaceae;g__Aquabacterium;s__	97.97	2.169	0.665	Burkholderiales	54235	3665552	binsA	Recovered from 'Golden Delicious'
bin.10	d__Bacteria;p__Proteobacteria;c__Gammaproteobacteria;o__Burkholderiales;f__Burkholderiaceae;g__Hylemonella;s__	94.17	3.878	0.654	Burkholderiales	17243	3689016	binsBC	Recovered from 'Golden Delicious'
bin.11	d__Bacteria;p__Proteobacteria;c__Gammaproteobacteria;o__Pseudomonadales;f__Moraxellaceae;g__Acinetobacter;s__	99.36	0.273	0.386	Moraxellaceae	90554	3989917	binsA	Recovered from 'Golden Delicious'
bin.12	d__Bacteria;p__Proteobacteria;c__Alphaproteobacteria;o__Reyranellales;f__Reyranellaceae;g__Reyranella;s__	97.93	1.243	0.658	Rhodospirillales	242092	8288865	binsB	Recovered from 'Golden Delicious'
bin.13	d__Bacteria;p__Proteobacteria;c__Gammaproteobacteria;o__Xanthomonadales;f__Xanthomonadaceae;g__Xanthomonas;s__	98.72	0.89	0.662	Gammaproteobacteria	39612	4687441	binsC	Recovered from 'Golden Delicious'
bin.14	d__Bacteria;p__Proteobacteria;c__Alphaproteobacteria;o__Rhizobiales;f__Hyphomicrobiaceae;g__Hyphomicrobium_A;s__	98.79	1.854	0.645	Rhizobiales	153389	3995792	binsBC	Recovered from 'Golden Delicious'
bin.15	d__Bacteria;p__Proteobacteria;c__Alphaproteobacteria;o__Caulobacterales;f__Caulobacteraceae;g__Brevundimonas;s__	98.96	0.676	0.664	Alphaproteobacteria	61193	3118545	binsC	Recovered from 'Golden Delicious'
bin.16	d__Bacteria;p__Proteobacteria;c__Gammaproteobacteria;o__Burkholderiales;f__Burkholderiaceae;g__;s__	97.02	0.73	0.569	Burkholderiales	31203	3528451	binsABC	Recovered from 'Golden Delicious'
bin.17	d__Bacteria;p__Proteobacteria;c__Alphaproteobacteria;o__Sphingomonadales;f__Sphingomonadaceae;g__Sphingomonas;s__	95.57	3.395	0.69	Sphingomonadales	59485	3520215	binsA	Recovered from 'Golden Delicious'
bin.18	d__Bacteria;p__Bacteroidota;c__Bacteroidia;o__Chitinophagales;f__Chitinophagaceae;g__Sediminibacterium;s__	100	0	0.447	Bacteroidetes	309342	3393009	binsA	Recovered from 'Golden Delicious'
bin.19	d__Bacteria;p__Proteobacteria;c__Gammaproteobacteria;o__Burkholderiales;f__Burkholderiaceae;g__Comamonas;s__	94.01	1.587	0.654	Comamonadaceae	23279	4434524	binsAC	Recovered from 'Golden Delicious'
bin.2	d__Bacteria;p__Acidobacteriota;c__Acidobacteriae;o__Acidobacteriales;f__Acidobacteriaceae;g__Terriglobus;s__	98.46	3.716	0.593	Bacteria	31157	4503939	binsA	Recovered from 'Golden Delicious'
bin.20	d__Bacteria;p__Proteobacteria;c__Gammaproteobacteria;o__Enterobacterales;f__Enterobacteriaceae;g__Pantoea;s__	96.32	1.874	0.552	Enterobacteriaceae	55221	4670856	binsBC	Recovered from 'Golden Delicious'
bin.21	d__Bacteria;p__Proteobacteria;c__Alphaproteobacteria;o__UBA9655;f__UBA9655;g__UBA9655;s__	93.54	0	0.41	Bacteria	121241	2026113	binsA	Recovered from 'Golden Delicious'
bin.22	d__Bacteria;p__Proteobacteria;c__Alphaproteobacteria;o__Rhizobiales;f__Rhizobiaceae;g__Mesorhizobium;s__	98.27	1.065	0.634	Rhizobiales	217919	5495784	binsA	Recovered from 'Golden Delicious'
bin.23	d__Bacteria;p__Proteobacteria;c__Gammaproteobacteria;o__Enterobacterales;f__Enterobacteriaceae;g__Pantoea;s__	99.26	3.639	0.55	Enterobacteriaceae	215744	5043574	binsC	Recovered from 'Golden Delicious'
bin.3	d__Bacteria;p__Proteobacteria;c__Gammaproteobacteria;o__Pseudomonadales;f__Pseudomonadaceae;g__Pseudomonas_E;s__	90.18	4.567	0.624	Pseudomonadales	17378	4466332	binsBC	Recovered from 'Golden Delicious'
bin.4	d__Bacteria;p__Proteobacteria;c__Gammaproteobacteria;o__Burkholderiales;f__Neisseriaceae;g__Neisseria;s__	99.47	0.112	0.491	Neisseriaceae	242213	2224236	binsBC	Recovered from 'Golden Delicious'
bin.5	d__Bacteria;p__Proteobacteria;c__Alphaproteobacteria;o__Sphingomonadales;f__Sphingomonadaceae;g__Sphingomonas;s__	96.27	2.914	0.656	Sphingomonadales	87867	3997135	binsABC	Recovered from 'Golden Delicious'
bin.6	d__Bacteria;p__Actinobacteriota;c__Actinomycetia;o__Propionibacteriales;f__Propionibacteriaceae;g__Cutibacterium;s__	99.34	2.741	0.6	Actinomycetales	12977	2474767	binsC	Recovered from 'Golden Delicious'
bin.7	d__Bacteria;p__Proteobacteria;c__Alphaproteobacteria;o__Caedimonadales;f__;g__;s__	91.39	0	0.398	Bacteria	291247	1620468	binsA	Recovered from 'Golden Delicious'
bin.8	d__Bacteria;p__Proteobacteria;c__Gammaproteobacteria;o__Enterobacterales;f__Enterobacteriaceae;g__Kosakonia;s__	96.57	2.242	0.562	Enterobacteriaceae	31372	4562573	binsBC	Recovered from 'Golden Delicious'
bin.9	d__Bacteria;p__Proteobacteria;c__Gammaproteobacteria;o__Pseudomonadales;f__Pseudomonadaceae;g__Pseudomonas_E;s__	99.31	2.981	0.623	Pseudomonas	48190	5452472	binsBC	Recovered from 'Golden Delicious'

## Sheet: Penicillium expansum
Organism Scientific Name	Organism Common Name	Organism Qualifier	Taxonomy id	Assembly Name	Assembly Accession	Source	Annotation	Level	Contig N50	Size	Submission Date	Gene Count	BioProject	BioSample
Penicillium expansum		strain: d1	27334	ASM76973v1	GCA_000769735.1	GenBank	Annotation submitted by Center for Genomic Regulation (CRG)	Contig	360559	32065046	2014-10-28	11023	PRJNA255745	SAMN02928572

## Sheet: Methylobacterium radiotolerans
Organism Scientific Name	Organism Common Name	Organism Qualifier	Taxonomy id	Assembly Name	Assembly Accession	Source	Annotation	Level	Contig N50	Size	Submission Date	Gene Count	BioProject	BioSample
Methylobacterium radiotolerans JCM 2831		strain: JCM 2831	426355	ASM1972v1	GCA_000019725.1	GenBank	Annotation submitted by US DOE Joint Genome Institute	Complete Genome	6077833	6899110	2008-03-21	6626	PRJNA18817	SAMN00000277
Methylobacterium radiotolerans JCM 2831		strain: JCM 2831	426355	ASM1972v1	GCF_000019725.1	RefSeq	NCBI Prokaryotic Genome Annotation Pipeline (PGAP)	Complete Genome	6077833	6899110	2008-03-21	6607	PRJNA18817	SAMN00000277
